# Supplementary figures and images for: Approaches for the Efficient Removal of Fluoride from Groundwater: A Comprehensive Review
Source: MDPI journal article supplement (doi:10.3390/toxics12050306), 2024-04-23

## Identification of studies via databases and registers

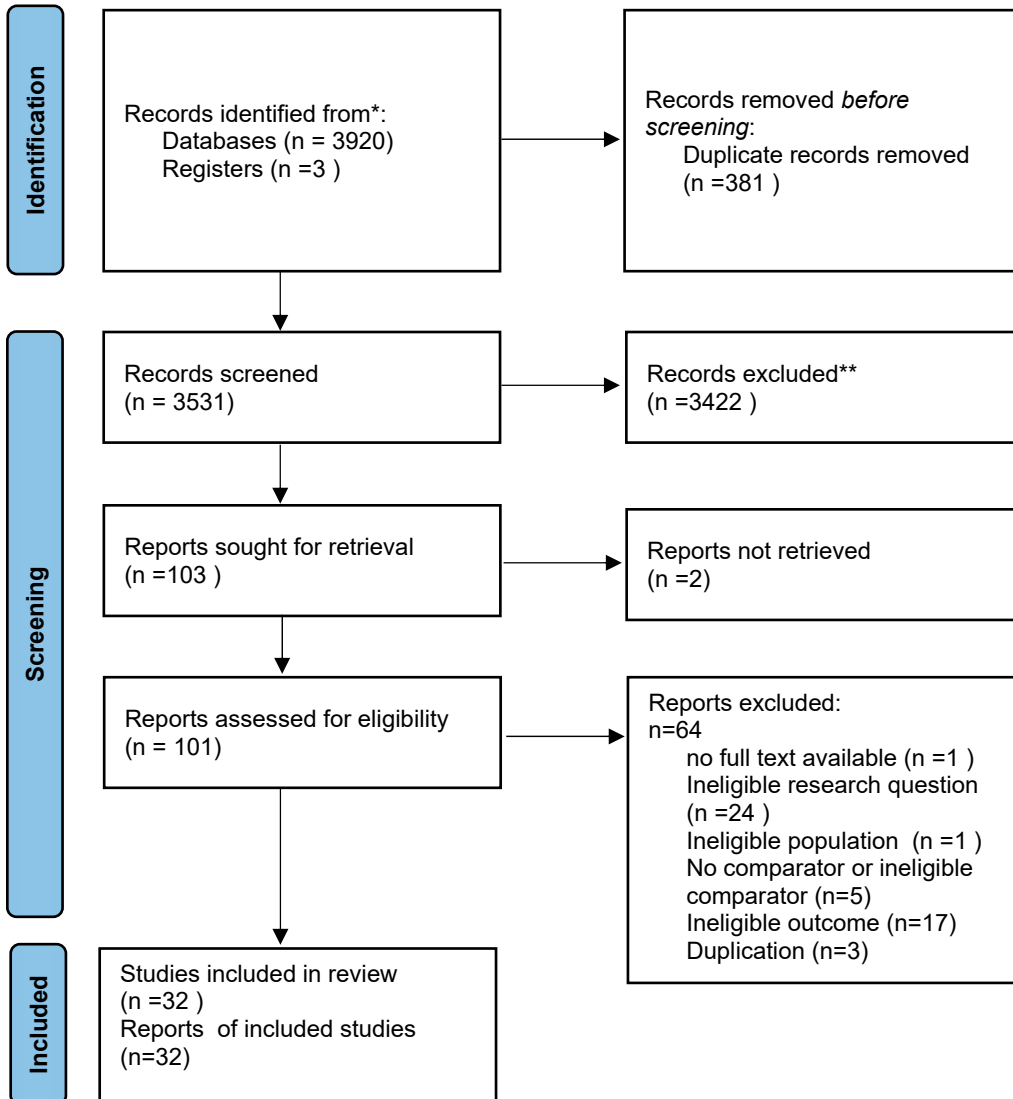

Supplement: s1 [file s1]
